# Supplementary material
Source: PubMed Central journal article supplement (PMC7418177)

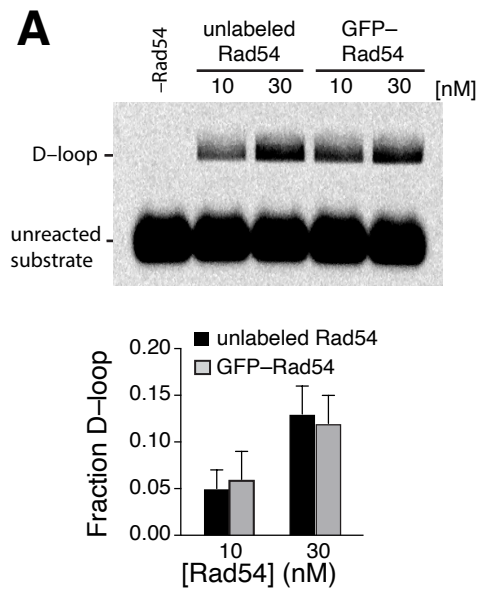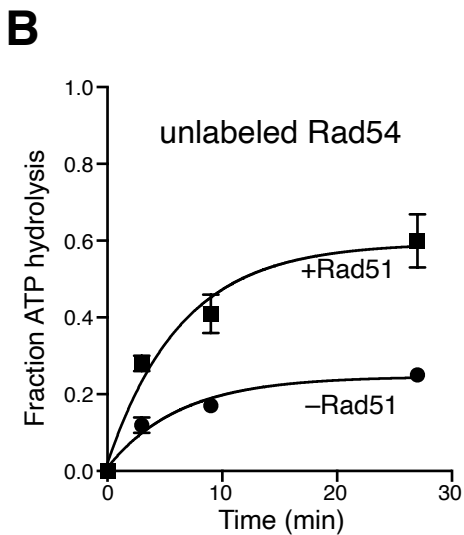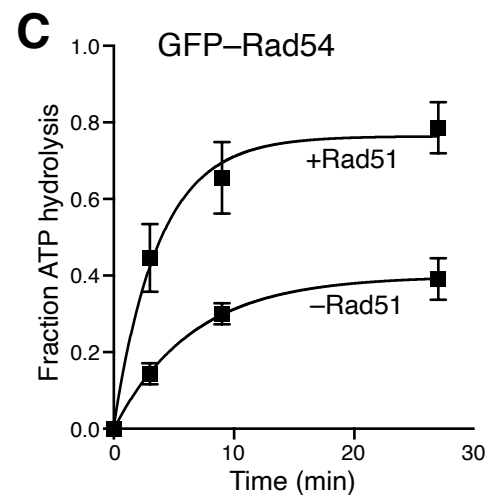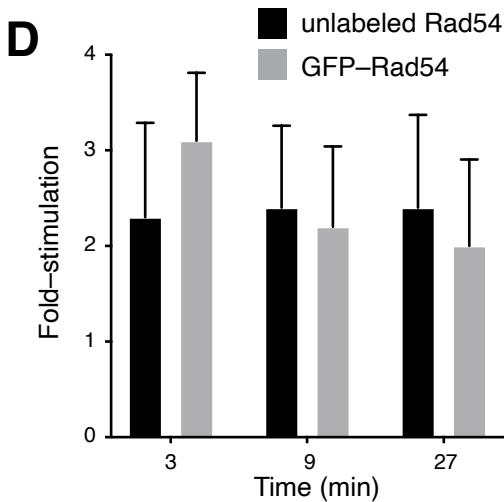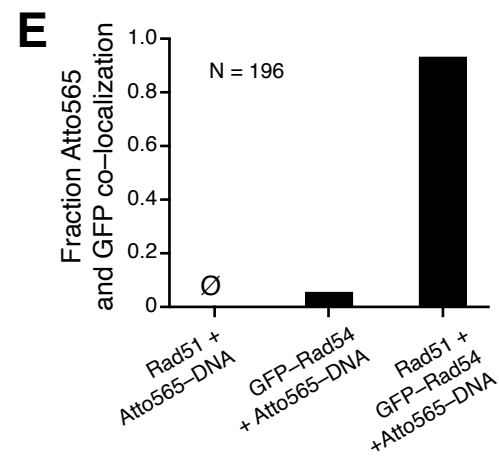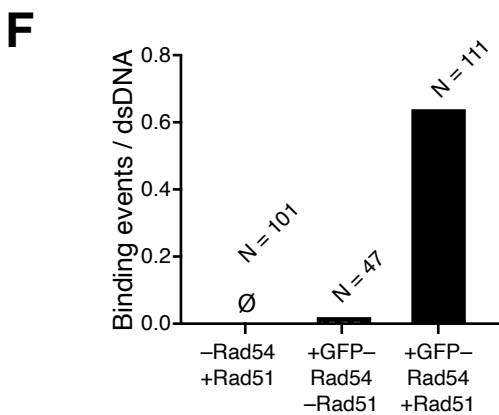

Supplement: NIHMS1596960-supplement-1.pdf [file NIHMS1596960-supplement-1.pdf]

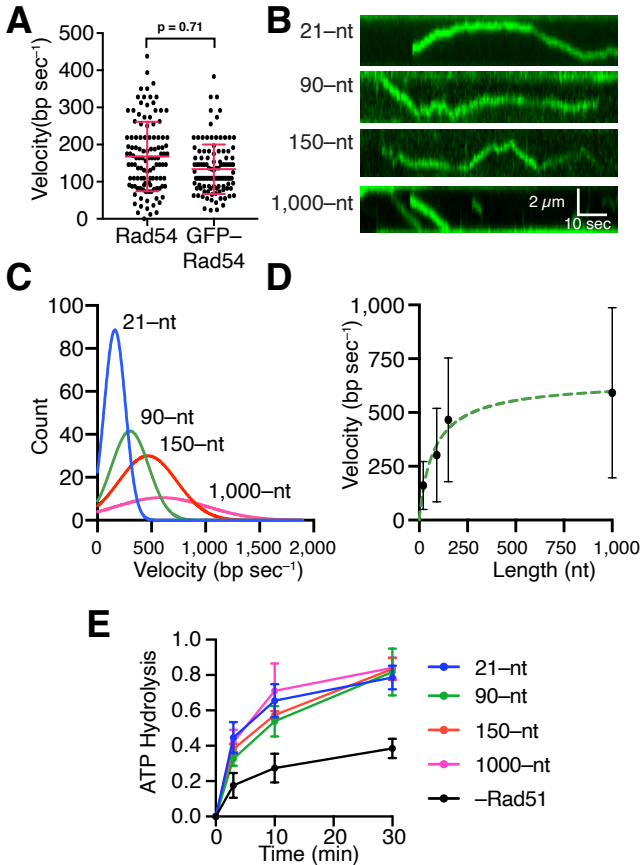

Supplement: NIHMS1596960-supplement-2.pdf [file NIHMS1596960-supplement-2.pdf]

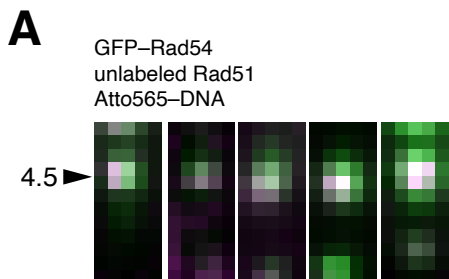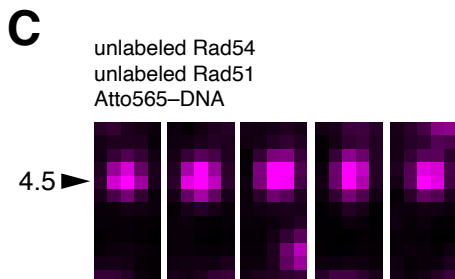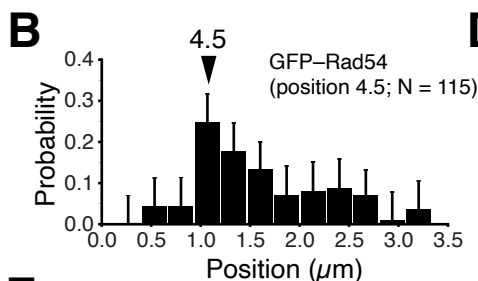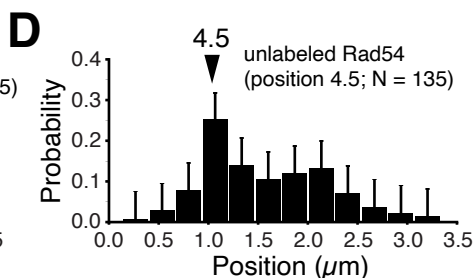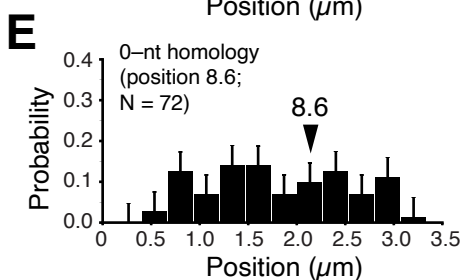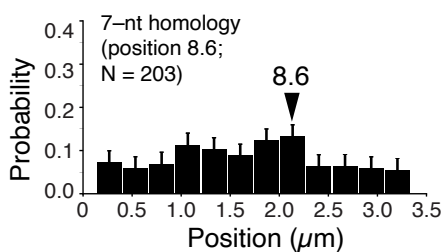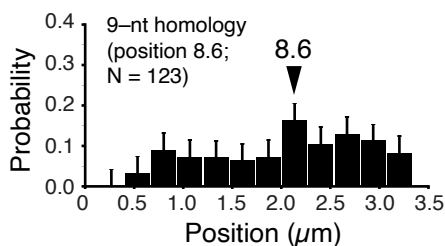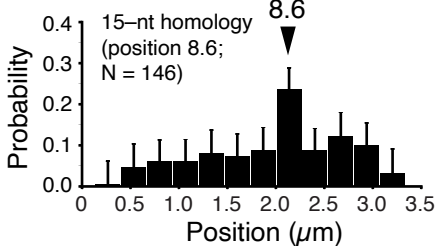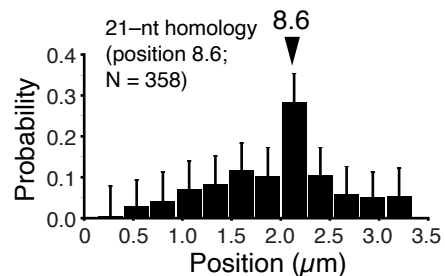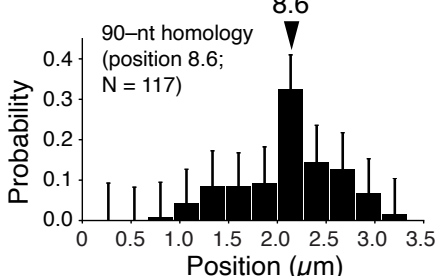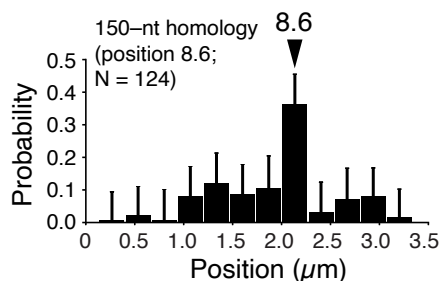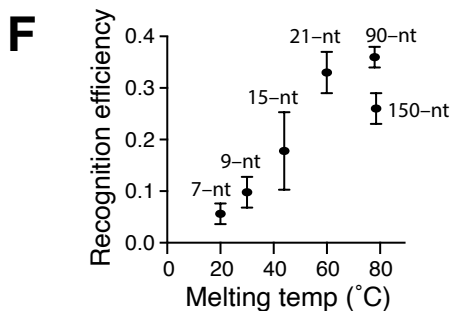

Supplement: NIHMS1596960-supplement-3.pdf [file NIHMS1596960-supplement-3.pdf]

**A**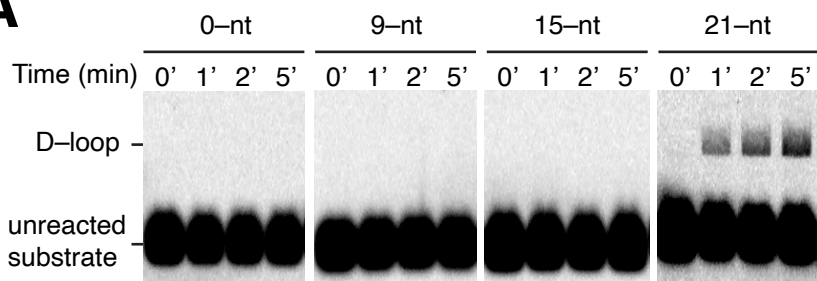**B**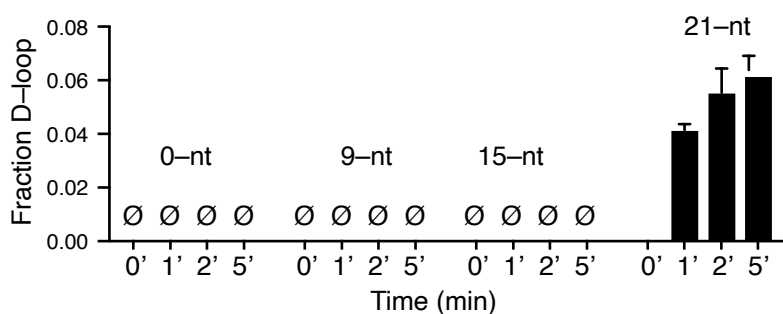**C**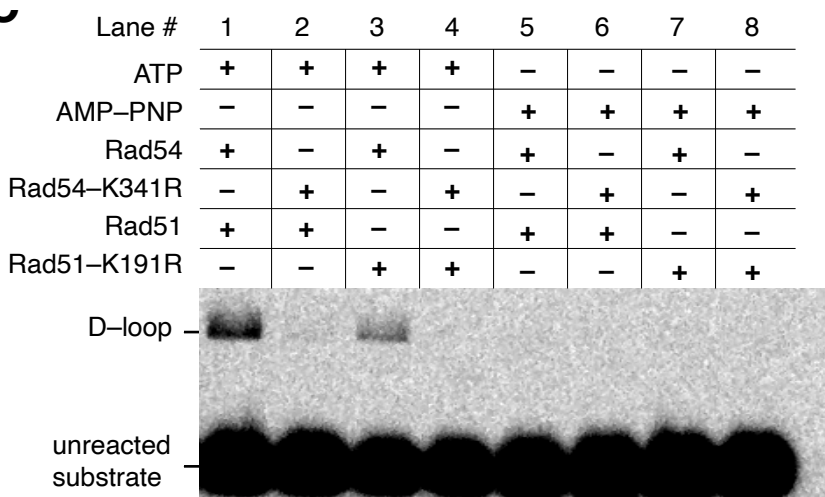**D**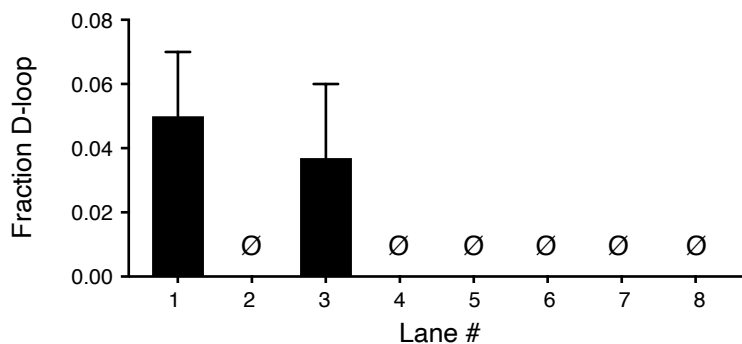

Supplement: NIHMS1596960-supplement-4.pdf [file NIHMS1596960-supplement-4.pdf]

**A**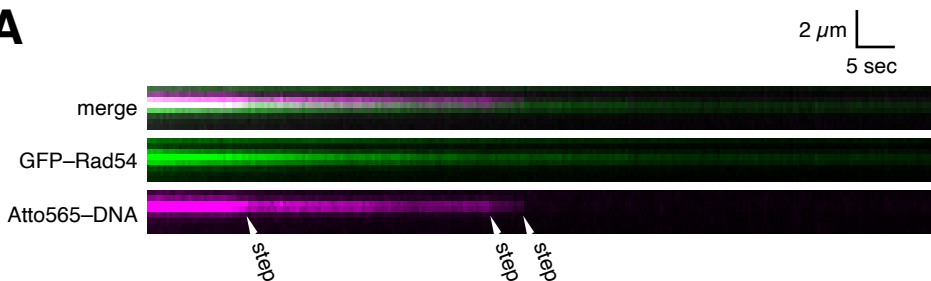**B**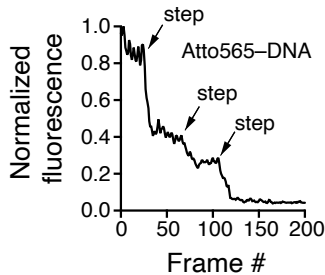**C**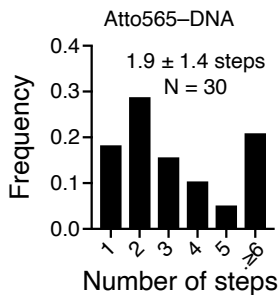**D**

GFP-Rad54 : Rad54 (1:5)

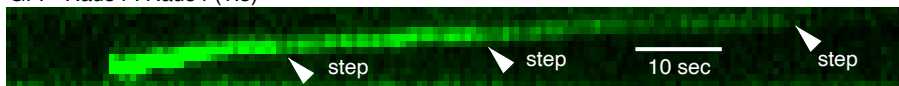**E**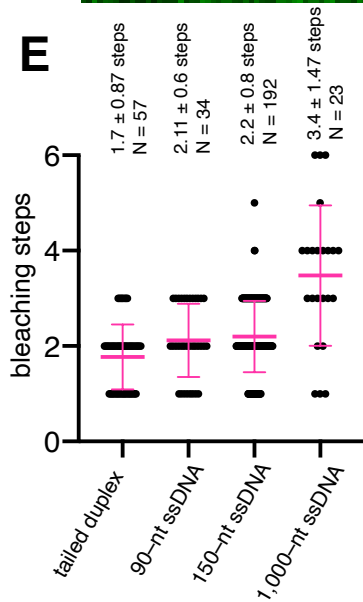**F**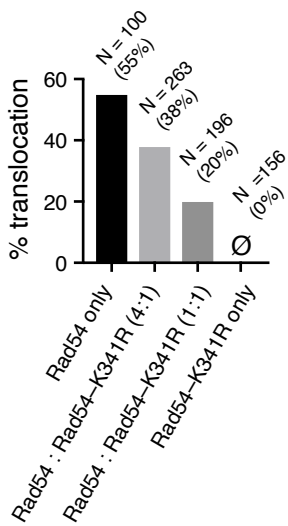**G**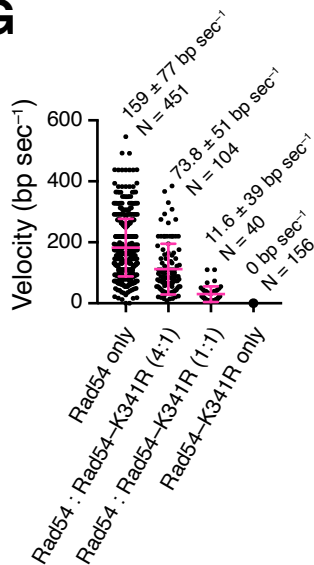

Supplement: NIHMS1596960-supplement-5.pdf [file NIHMS1596960-supplement-5.pdf]

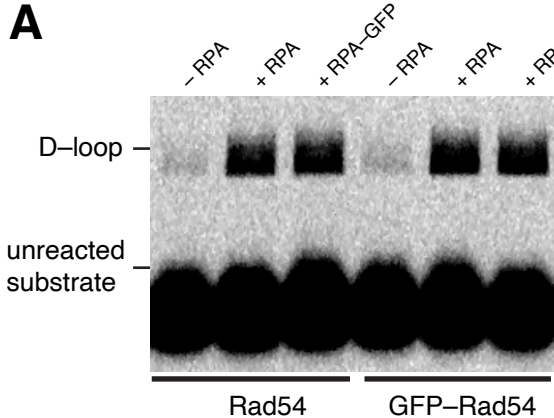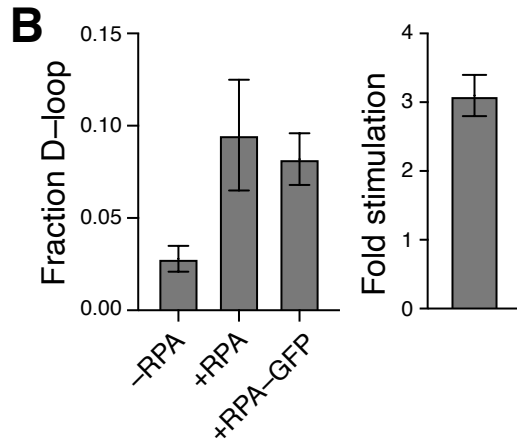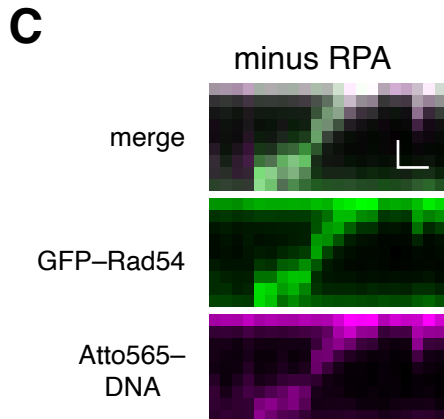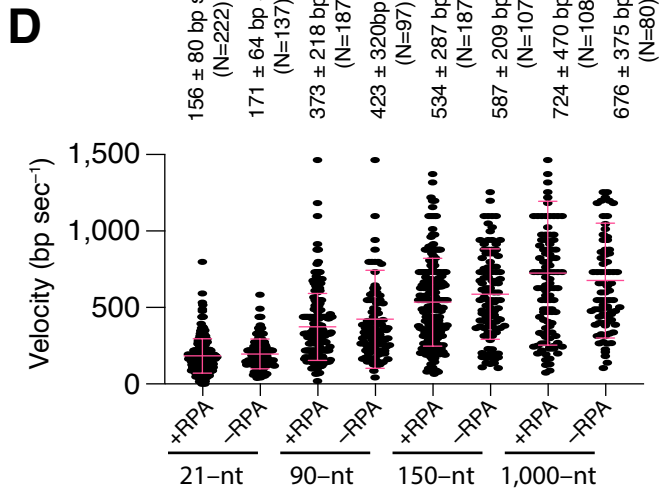

Supplement: NIHMS1596960-supplement-6.pdf [file NIHMS1596960-supplement-6.pdf]

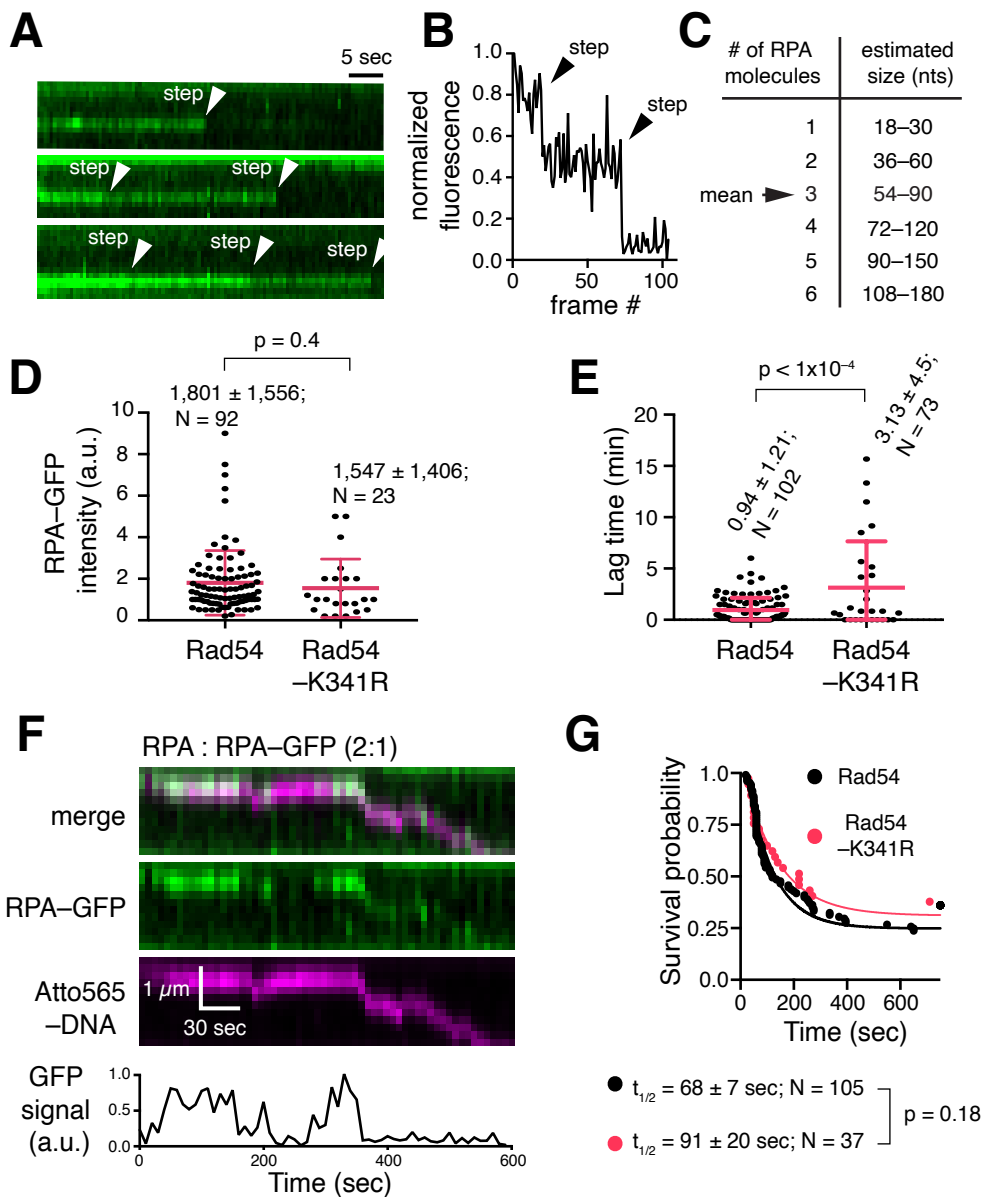

Supplement: NIHMS1596960-supplement-7.pdf [file NIHMS1596960-supplement-7.pdf]
